# Supplementary material
Source: PubMed Central journal article supplement (PMC4140901)

## Supplemental Data

### Figure legends:

**Supplemental Table 1. Peptides identified from tryptic digests of 4-HNE treated rAMPK $\alpha$ .** 10 micrograms of rAMPK $\alpha$  was treated with 4-HNE (molar ratio 5:1), trypsin digested and analyzed using LC/MS as described in Methods. Peptides containing a 4-HNE adducts are in bold with \* denoting specific residues modified.

**Supplemental Figure 1. Identification of 4-HNE modified rAMPK $\alpha/\beta$  at residue Cys<sup>130</sup>, Cys<sup>174</sup>, Cys<sup>227</sup> and Cys<sup>304</sup>, Cys<sup>225</sup> using LC/MS/MS analysis.** (A) 4-HNE modified peptide containing Cys<sup>130</sup> (+158), MS/MS analysis was performed and the resulting b/y ion fragmentation confirmed peptide identity (LFQQILSGVDYC\*HR). (B) 4-HNE modified peptide containing Cys<sup>174</sup> (+158), MS/MS analysis was performed and the resulting b/y ion fragmentation confirmed peptide identity (TSC\*GSPNYAAPEVISGR). (C) 4-HNE modified peptide containing Cys<sup>227</sup> (+158), MS/MS analysis was performed and the resulting b/y ion fragmentation confirmed peptide identity (IC\*DGIFYTPQYLNPSVISLLK). (D) 4-HNE modified peptide containing Cys<sup>304</sup> (+158), MS/MS analysis was performed and the resulting b/y ion fragmentation confirmed peptide identity (FEC\*SEEEVLSCLYNR). (E) 4-HNE modified peptide containing Cys<sup>225</sup> (+158), MS/MS analysis was performed and the resulting b/y ion fragmentation confirmed peptide identity (DTGISC\*DPALLPEPNHVMLNHLYALSIK).

# Supplementary Figure 1A

## Cys130

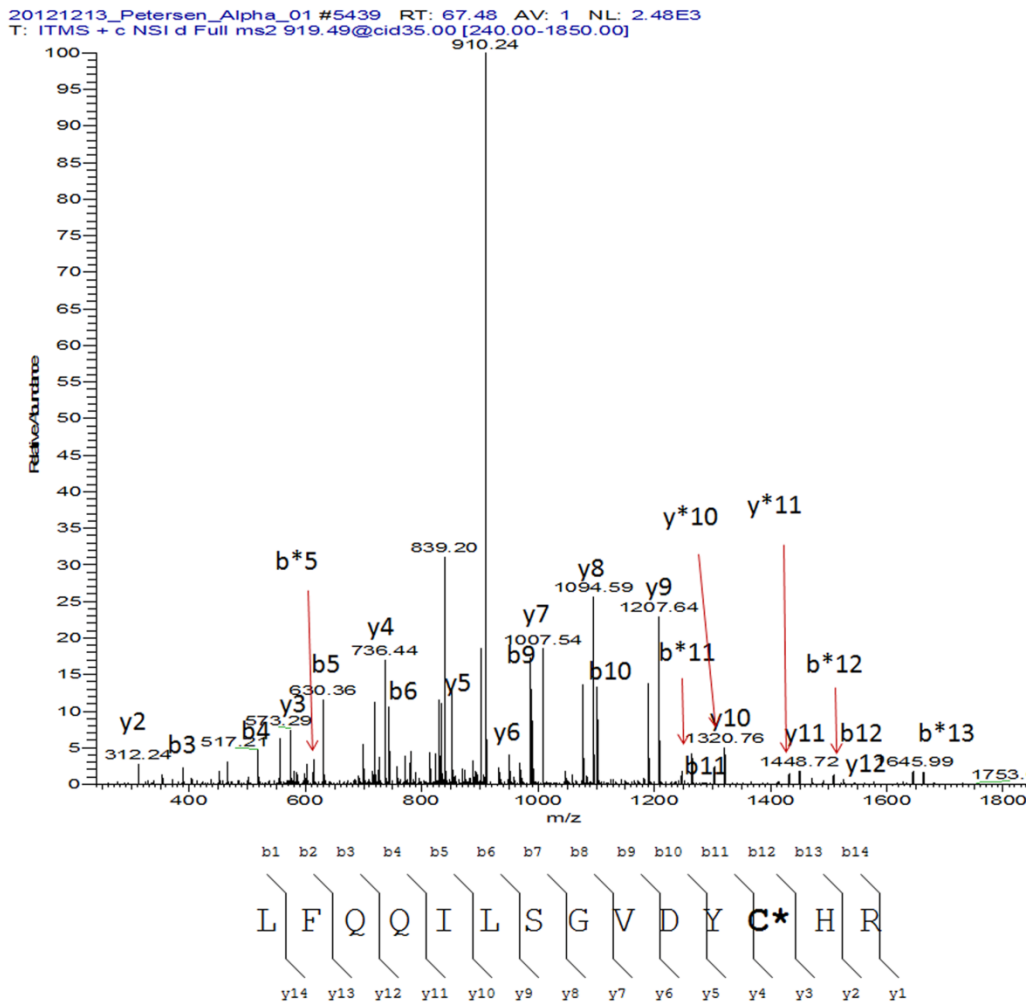

# Supplementary Figure 1B

## Cys174

20121213 Petersen Alpha 01 #3901 RT: 48.56 AV: 1 NL: 7.85E3  
 T: ITMS + c NSI d Full ms2 934.47@cid35.00 [245.00-1880.00]

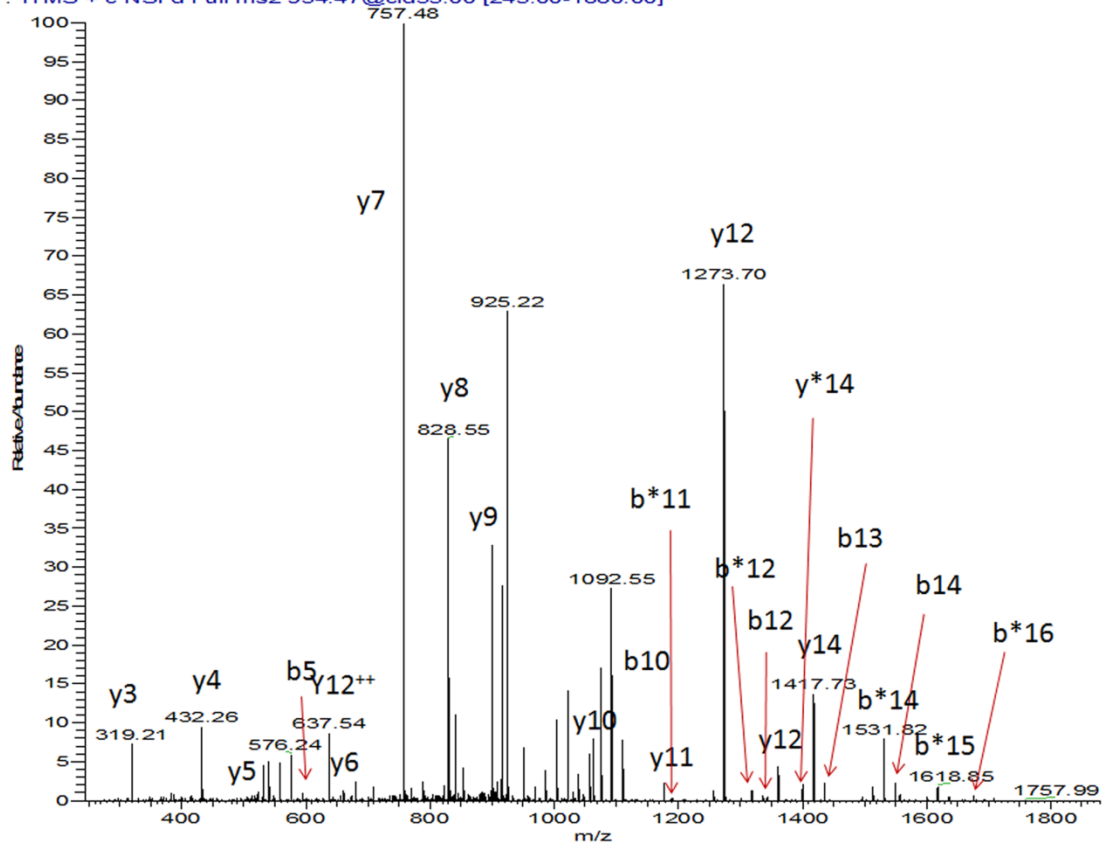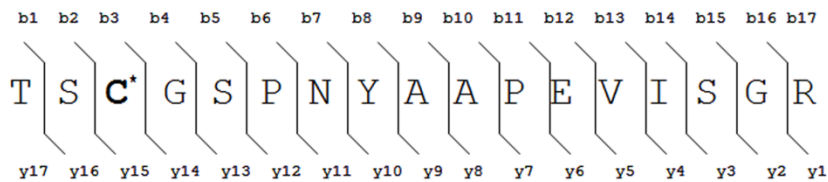

# Supplemental Figure 1c

## Cys227

20121213\_Petersen\_Alpha\_01#6529 RT: 81.05 AV: 1 NL: 2.40E3  
 T: ITMS + c NSI d Full ms2 1272.20@cid35.00 [340.00-2000.00]

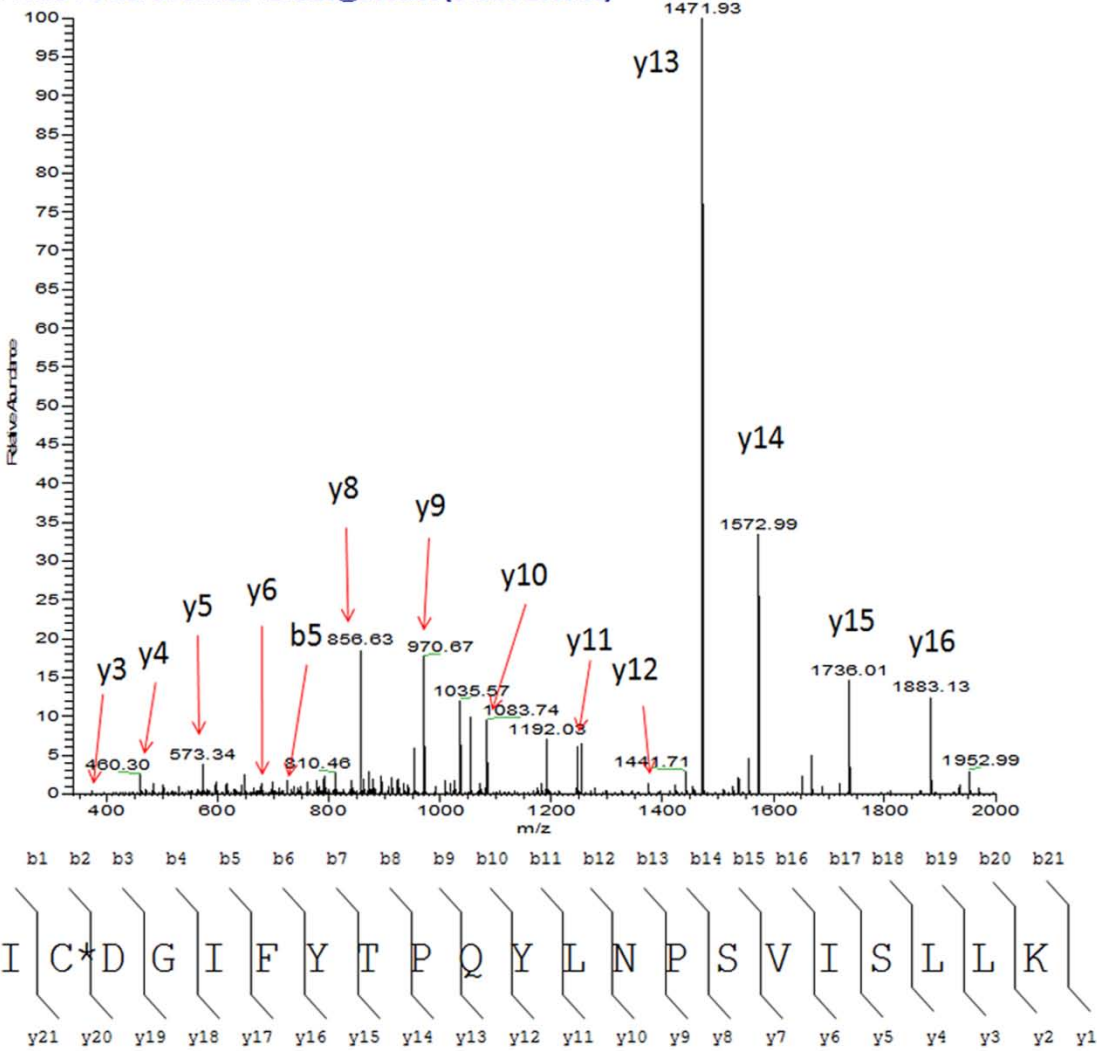

# Supplementary Figure 1d

## Cys304

20121213\_Petersen\_Alpha\_01 #5914 RT: 73.48 AV: 1 NL: 1.02E3  
 T: ITMS + c NSI d Full ms2 1018.97@cid35.00 [270.00-2000.00]

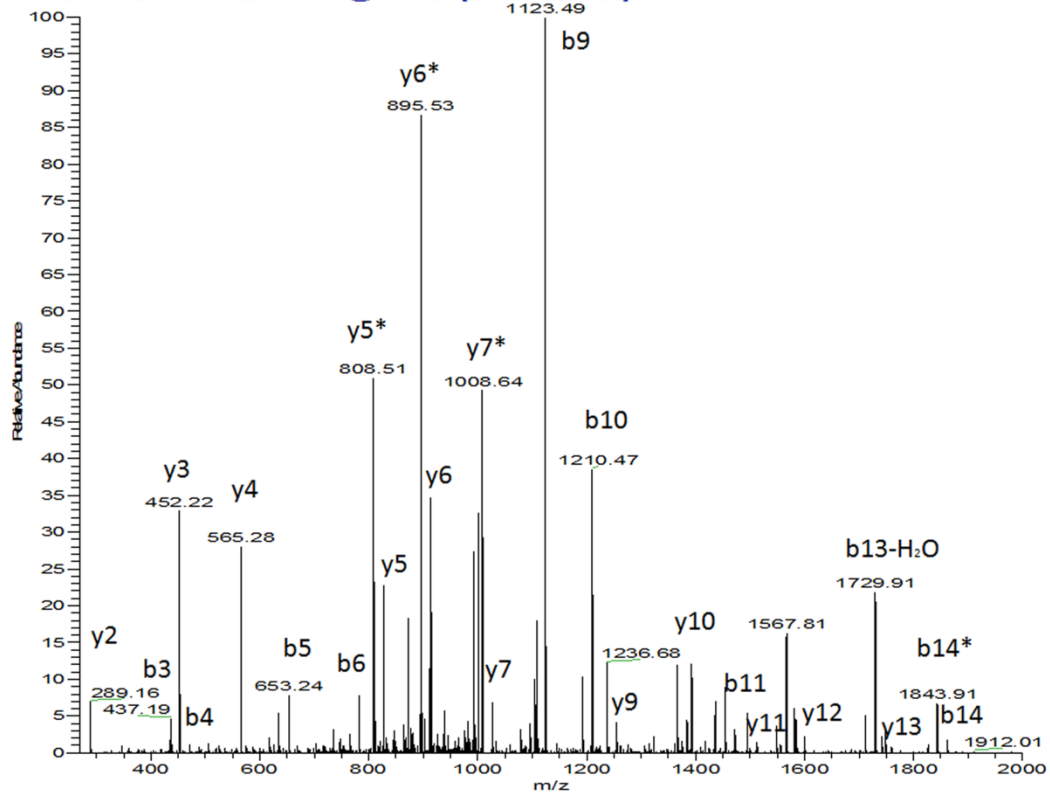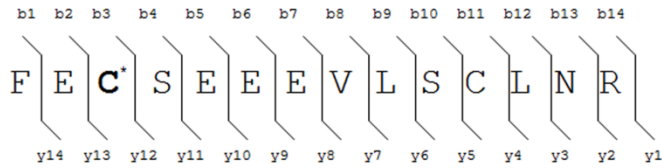

# Supplemental Figure 1E.

## Cys 225 AMPK $\beta$

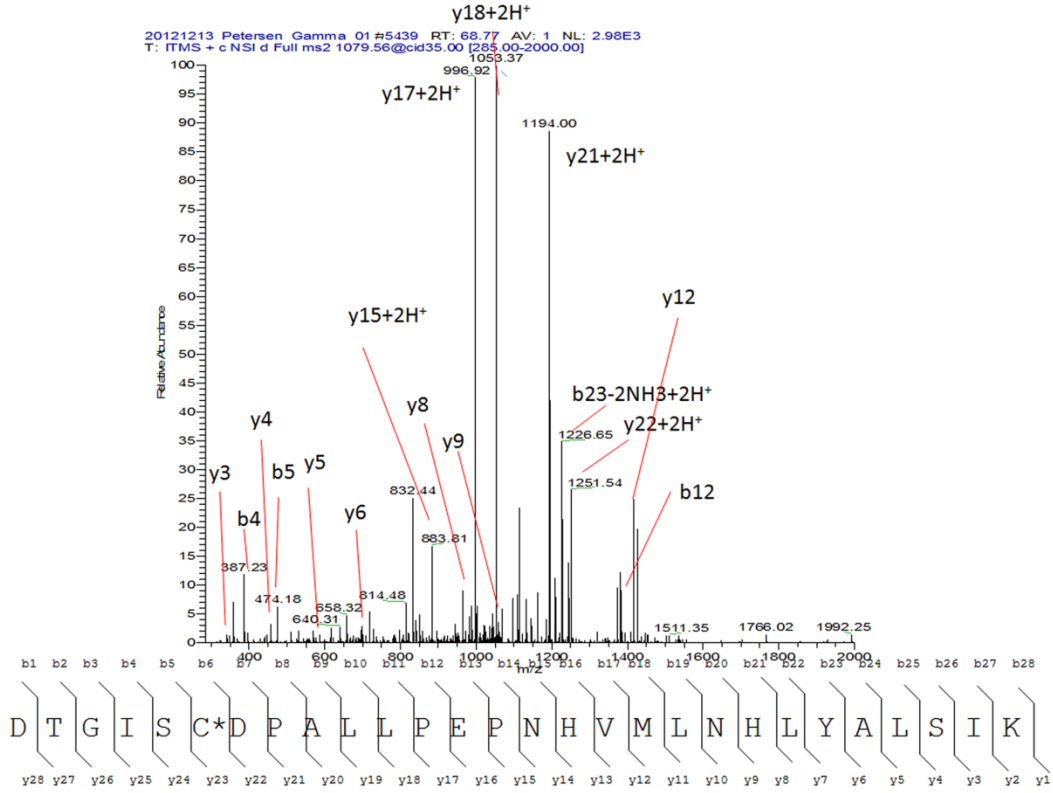

Supplement: supp_M113.543942_jbc.M113.543942-1.pdf [file supp_M113.543942_jbc.M113.543942-1.pdf]
